# Supplementary material
Source: PubMed Central journal article supplement (PMC2568929)
Supplement: M804869200_1.pdf [file M804869200_1.pdf]

**NMR STRUCTURE OF THE N-TERMINAL COILED COIL DOMAIN OF THE ANDES  
HANTAVIRUS NUCLEOCAPSID PROTEIN**

Yu Wang,<sup>1#</sup> Daniel M. Boudreaux,<sup>2#</sup> D. Fernando Estrada,<sup>1</sup> Chet W. Egan,<sup>1</sup> Stephen C. St. Jeor,<sup>2</sup>  
and Roberto N. De Guzman<sup>1\*</sup>

Department of Molecular Biosciences<sup>1</sup>, University of Kansas, Lawrence, KS 66045 USA, and  
Department of Microbiology and Immunology<sup>2</sup>, University of Nevada, Reno, NV 89557 USA

Running head: Andes hantavirus nucleocapsid coiled coil

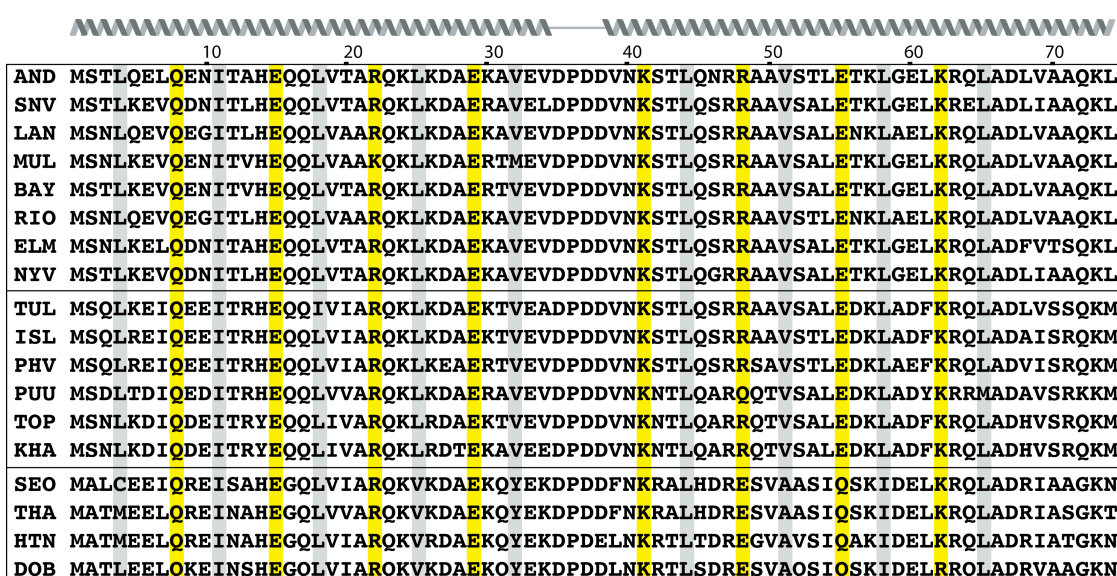

**Fig. S1.** Sequence alignment of hantavirus nucleocapsid N<sup>1-74</sup> coiled coil domain with the conserved hydrophobic (gray) and polar (yellow) heptads highlighted. The sequences are arranged according to hantaviral species that cause: **(top)** HCPS (Hantavirus CardioPulmonary Syndrome), **(middle)** non-pathogenic or mild form of HFRS (Hemorrhagic Fever with Renal Syndrome) and **(bottom)** severe form of HFRS. The hantavirus species are: AND, Andes; SNV, Sin Nombre; LAN, Laguna Negra; MUL, Muleshoe; BAY, Bayou; RIO, Rio Mamore; ELM, El Moro Canyon; NYV, New York; TUL, Tula; ISL, Isla Vista; PHV, Prospect Hill; PUU, Puumala; TOP, Topografov; KHA, Khabarovsk; SEO, Seoul; THA, Thailand; HTN, Hantaan; DOB, Dobrava.

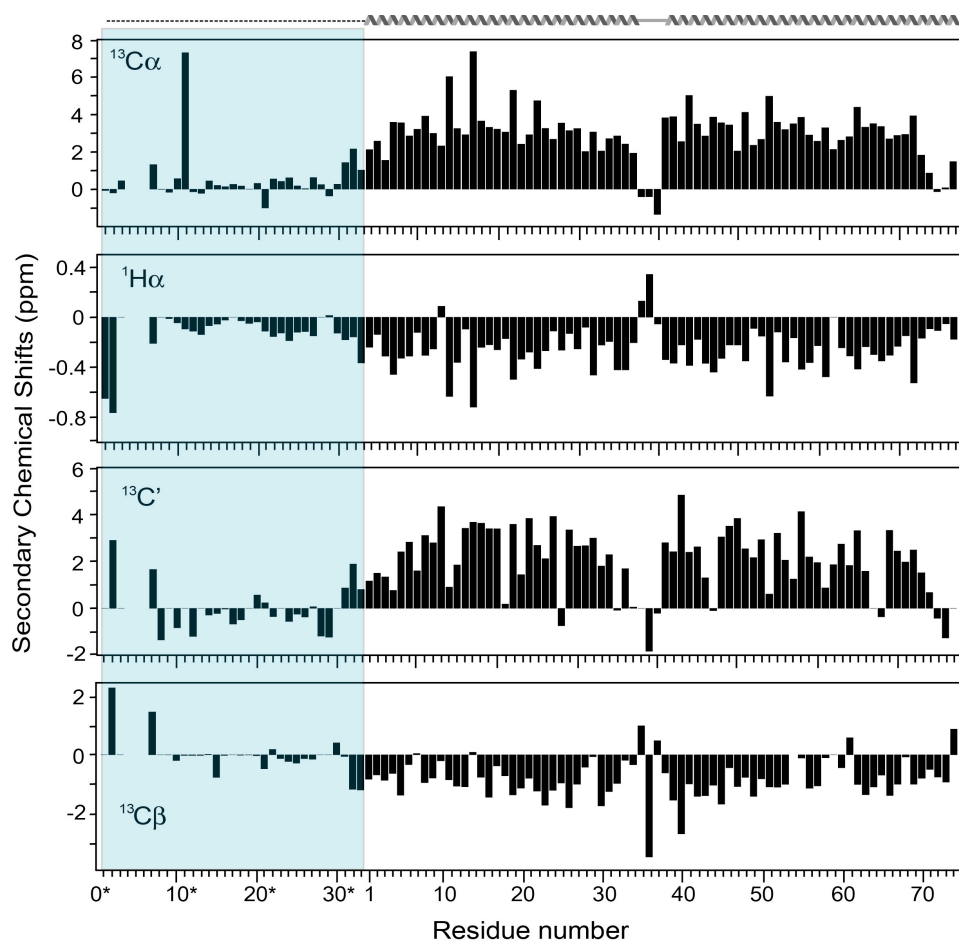

**Fig. S2.** Secondary  $\text{C}^\alpha$ ,  $\text{H}^\alpha$ ,  $\text{C}'$ , and  $\text{C}^\beta$  chemical shifts show that the first 33 residues (shaded), which are the His-tag from pET151, lack secondary structure whereas the Andes virus  $\text{N}^{1-74}$  region consists of two  $\alpha$ -helices.

**Table S1.** Structural statistics for 20 NMR structures of Andes virus N<sup>1-74</sup> coiled coil domain.

|                                                        |       |
|--------------------------------------------------------|-------|
| Total unambiguous distance restraints                  | 1432  |
| Intraresidue (i,i)                                     | 92    |
| Sequential (i, i+1)                                    | 361   |
| Medium Range (2<= i-j <=4)                             | 700   |
| Long Range ( i-j  > 4)                                 | 279   |
| Hydrogen bond restraints (19 hydrogen bonds)           | 38    |
| Total dihedral angle restraints                        | 135   |
| Phi                                                    | 73    |
| Psi                                                    | 62    |
| RMS difference from mean structure                     |       |
| Backbone atoms (N,C <sup>α</sup> ,C <sup>γ</sup> ) (Å) | 0.21  |
| All heavy atoms (C,N,O) (Å)                            | 0.53  |
| Violation analysis                                     |       |
| Max distance violation (Å)                             | 0.27  |
| Max dihedral angle violation (°)                       | 3.2   |
| Energies                                               |       |
| mean AMBER energy (kcal mol <sup>-1</sup> )            | -3861 |
| mean restraint energy (kcal mol <sup>-1</sup> )        | 117   |
| Ramachandran plot                                      |       |
| Most favorable region                                  | 91.4% |
| Additionally allowed regions                           | 8.2%  |
| Generously allowed regions                             | 0.4%  |
| Disallowed regions                                     | 0.1%  |

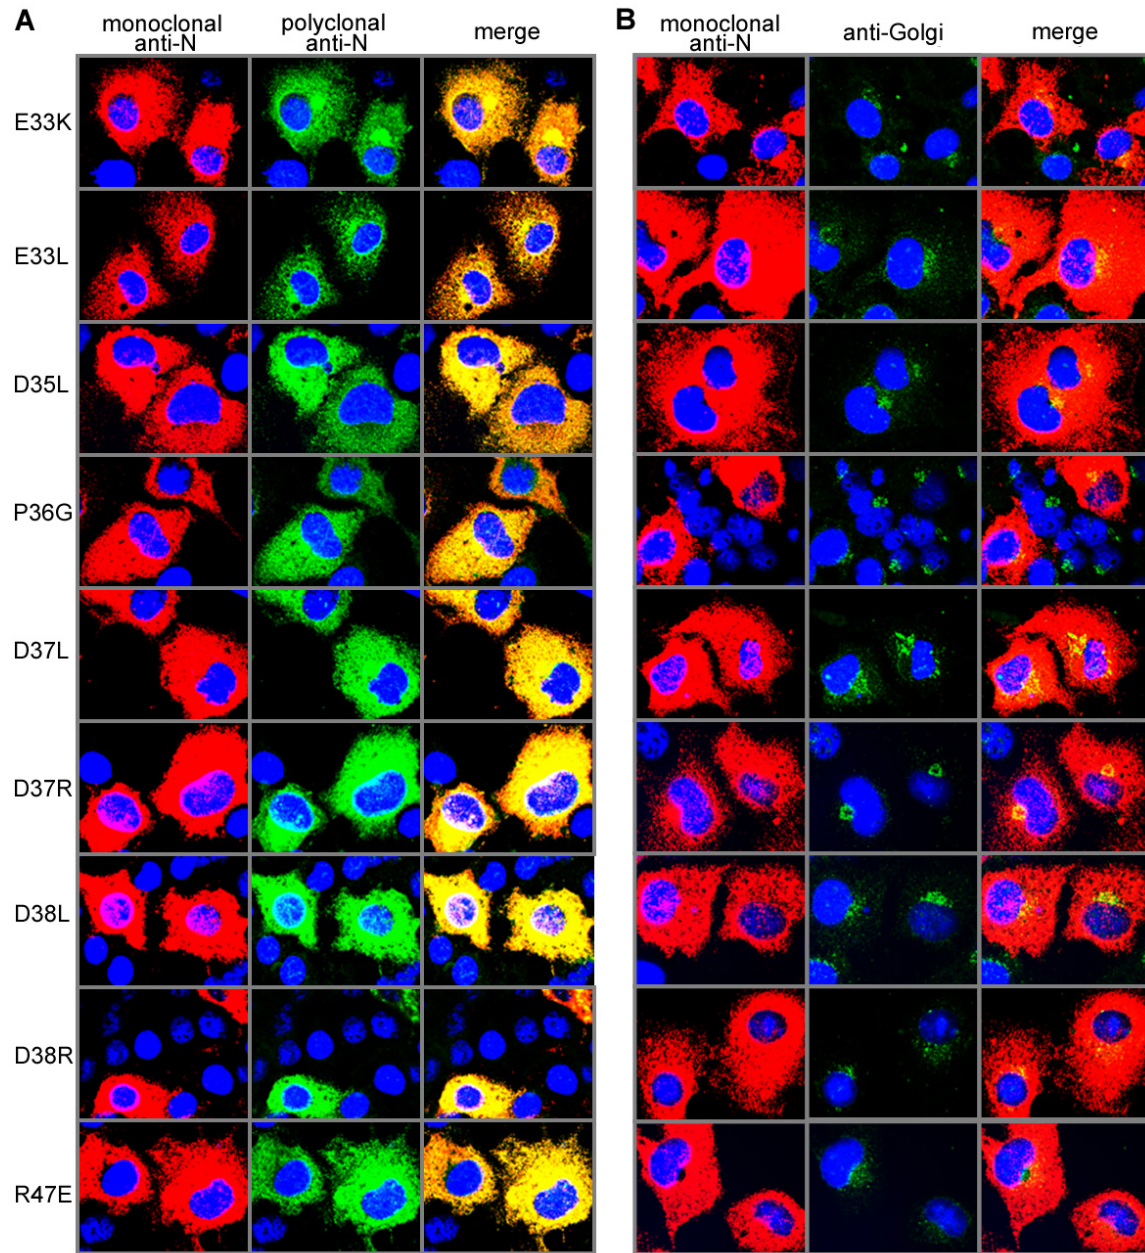

**Fig. S3.** Immunocytochemistry of full length N protein with mutations in the N<sup>1-74</sup> coiled coil domain. Cos-7 cells were transfected with wild type and mutant N protein, and doubly stained with **(A)** monoclonal and polyclonal anti-N antibodies, and **(B)** monoclonal anti-N and Golgi-specific antibodies. The anti-N monoclonal antibody was AB34757 from Abcam (Cambridge, Mass.).
